# Supplementary material for: Prevention of unplanned interruption in critically ill continuous renal replacement therapy patients:a best practice implementation project
Source: Research Square preprint supplement (doi:10.21203/rs.3.rs-7559230/v1), 2025-10-06
Supplement: Supplementary file 1 [file 3b0d379784ab60ac11fbb6b8.docx]

**General information questionnaire**

General information questionnaires for health-care workers

1.Your gender □male □female

2.Your age (in years)

3.Your years of work experience (years)

4.Your Academic Qualifications

□Bachelor's Degree □Master's Degree □Doctor's Degree

1. Your Professional Title

□Junior □Intermediate □Senior

General information questionnaires for patients

1.Patient's gender □male □female

2.Patient's age (in years)

3.Patient's weight (kg)

4.Duration of patient's mechanical ventilation（h）

5.The patient's length of stay in the ICU（h）

6.The patient's drainage output within 24 hours postoperatively（ml）

7.The patient's APACHE II score
