# Supplementary material for: Prevention of unplanned interruption in critically ill continuous renal replacement therapy patients:a best practice implementation project
Source: Research Square preprint supplement (doi:10.21203/rs.3.rs-7559230/v1), 2025-10-06
Supplement: Supplementary file 2 [file b1b3c577cc27fc97872e34a9.docx]

Table 1 Summary of Evidence for Unplanned Discontinuation of CRRT in Critically Ill Patients and Content of Review Criteria

| **Dimension** | **Evidence** | **Review Criteria** | **Review Method** |
| --- | --- | --- | --- |
| **Organizational Management** | 1. Establish a CRRT quality control system, using the rate of unplanned discontinuation as a quality indicator for continuous improvement. | 1. Establish a CRRT quality control team within the department and designate the rate of unplanned CRRT discontinuation as a quarterly quality control monitoring indicator for the department. | On-site inspection |
| 2. Healthcare personnel involved in CRRT must undergo training in anticoagulation management, alarm response procedures, and obtain relevant certifications. Departments should conduct regular assessments and provide refresher training. | 2. The departmental CRRT quality control team conducts quarterly training sessions. The hospital critical care team administers qualification assessments for medical personnel performing CRRT. Qualified individuals undergo re-evaluation every two years; only those who pass the assessment are authorized to perform the procedure. | On-site inspection |
| 3. Implement preventative unplanned shutdown verification forms to document the execution of preventative measures. | 3. The department's CRRT quality control team shall prepare corresponding checklists for preventing unplanned discontinuation. One nurse shall monitor 1–2 CRRT patients, with the responsible team leader or research nurse documenting the implementation of preventive measures. | On-site inspection |
| 4.1 A maximum of 1 to 2 CRRT patients may be cared for simultaneously by one nurse to ensure the quality of CRRT operation. |  |
| **Pre-operation management** | 5. Before starting the machine, jointly evaluate the treatment plan with the physician. The CRRT filtration fraction should be maintained between 20% and 25%. | 4. Medical staff are aware that the order of preference for catheter placement sites is the right internal jugular vein, followed by the femoral vein; then the left internal jugular vein, followed by the subclavian vein. The final placement site is determined in consultation with the attending physician based on the patient's condition. |  |
| 6. The sequence for selecting catheter placement sites is: right internal jugular vein, femoral vein; left internal jugular vein, subclavian vein. |  |  |
| Under ultrasound guidance, the catheter is placed to minimize vascular injury; imaging studies are used to confirm the tip location of the internal jugular vein catheter in the right atrium and the tip location of the femoral vein catheter in the common iliac artery. |  |  |
| 7.Preferably select temporary CRRT catheters without tunnels or polyester sheaths. Opt for polyurethane or polyethylene materials. For temporary CRRT catheters longer than 20 cm, prioritize synthetic membrane materials with good biocompatibility. Avoid selecting filters with a high number of hollow fibers or shorter lengths. | 5. All CRRT catheters used in the department shall be made of polyurethane material without tunnels or polyester sheaths, with lengths meeting requirements, and shall be equipped with highly biocompatible filters. |  |
|  |  |
| 8. Opt for synthetic membrane materials with superior biocompatibility, avoiding filters with a high number of short hollow fibers. |  |
| 10. Assess CRRT catheter functionality prior to machine operation to ensure blood flow rate reaches 200–250 ml/min. | 6. Healthcare providers must assess CRRT catheter functionality before initiating treatment; a dual assessment is required when necessary. | On-site inspection or inquiry |
| 12. For patients without bleeding risk and no contraindications to heparin, choose 500 U/dL heparin saline for pre-filling and maintain perfusion for 20 minutes, followed by administration of normal saline for pre-filling. | 7. Nurses and attending physicians jointly assess patients for bleeding risk and contraindications to heparin therapy, implementing the corresponding pre-loading regimen. | On-site inspection or inquiry |
| 13. For patients at risk of bleeding or with contraindications to heparin, pre-fill the circuit with saline solution only. |  |
| 14. Before connecting the circuit loop to the CRRT catheter, ensure all sections of the circuit are securely connected to prevent air bubble alarms. | 8. Before starting the machine, two people must verify that all circuit connections are secure to prevent “bubble alarms.” |  |
| **Operations Management** | 15. Ultrafiltration output should be set according to the principle of “spending within means,” reassessed every 1 to 2 hours, and evaluated at any time as necessary. | 9. Healthcare providers understand that ultrafiltration volume should be set based on the patient's condition according to the principle of “balancing intake and output.” Reassess every 1 to 2 hours, or more frequently as needed, and record the patient's ultrafiltration volume hourly. | On-site inspection or inquiry |
|  | 16. Patients without uncontrolled active bleeding or coagulation disorders who are not receiving systemic anticoagulant therapy should be administered anticoagulants during CRRT. | 10. Administer anticoagulants during CRRT for patients with known uncontrolled active bleeding or coagulation disorders who are not receiving systemic anticoagulant therapy. |  |
|  | 17. For patients without citrate contraindications, when administering citrate anticoagulation, ensure that the free calcium concentration post-filter is 0.25–0.35 mmol/L, the free calcium concentration in venous blood is 1.00–1.35 mmol/L, and the serum total calcium to total free calcium ratio is <2.5. | 11. Healthcare providers shall be aware of and document patients without citrate contraindications who receive citrate anticoagulation. When administering citrate anticoagulation, ensure post-filter free calcium levels are maintained between 0.25 and 0.35 mmol/L. Maintain venous free calcium at 1.00–1.35 mmol/L and serum total calcium to total free calcium ratio <2.5. During citrate anticoagulation, electrolyte and blood gas monitoring should occur at the start of therapy and 1 hour post-treatment. Once therapy is stable, blood gas monitoring should be performed every 6–8 hours, with electrolyte monitoring every 12 hours. Monitoring intervals may be shortened for patients at risk of citrate accumulation. |  |
|  | 18. When using citrate anticoagulation, electrolyte and blood gas analysis monitoring should be performed before treatment initiation and 1 hour after treatment. Once treatment is stabilized, blood gas analysis should be monitored every 6 to 8 hours, with electrolyte monitoring every 12 hours. For patients at risk of citrate accumulation, monitoring intervals may be shortened. |  |  |
|  | 20. During CRRT, if citrate is contraindicated and there is no bleeding risk, use heparin or low molecular weight heparin for anticoagulation. When using heparin anticoagulation, administer a loading dose before initiating CRRT and proceed with blood withdrawal only after achieving the anticoagulation target. Monitor activated partial thromboplastin time (APTT) after 4 hours of CRRT operation. Once therapeutic stability is achieved, monitor coagulation function every 12 hours to maintain APTT between 45–70 seconds. | 12. Healthcare providers should be aware and document that during CRRT, citrate contraindications exist and there is no bleeding risk. Use heparin or low molecular weight heparin for anticoagulation. When employing heparin anticoagulation, administer a loading dose prior to initiating CRRT and proceed with blood withdrawal only after achieving the anticoagulation target. Monitor activated partial thromboplastin time (APTT) after 4 hours of CRRT operation. Once therapy is stabilized, monitor coagulation function every 12 hours to maintain APTT between 45–70 seconds. |  |
|  | 21. When a CRRT alarm occurs, immediately identify the cause and take appropriate action to minimize the duration of the blood pump stoppage. | 13. Medical personnel are aware of the causes of CRRT alarms and address them promptly. | On-site inspection or inquiry |
|  | 22. Continuously monitor coagulation-related pressures (transmembrane pressure and pre-filter pressure), and promptly adjust anticoagulation strategies when pressures rise. | 14. Healthcare personnel shall be aware of and document relevant pressure readings, and promptly address any pressure-related issues when they arise. | On-site inspection or inquiry |
|  | 23. Continuously monitor catheter-related pressures (antegrade blood pressure and retrograde pressure). When antegrade blood pressure falls below -200 mmHg (1 mmHg = 0.133 kPa) or retrograde pressure exceeds 200 mmHg, promptly address the contributing factors to prevent catheter dysfunction. |  |  |
|  | 24. When moving patients, ensure tubing is free of kinks and twists to prevent the blood pump from stopping. | 15. When moving patients, healthcare personnel must ensure tubing remains free of kinks or twists to prevent blood pump stoppage. If the patient becomes agitated, administer sedatives as necessary with physician approval. | On-site inspection or inquiry |
|  | 25. After replacing the fluid bag or addressing an alarm, adjust the fluid level in the IV bag to establish a blood-air interface. This prevents air alarms and reduces the risk of blood clots forming in the IV bag. | 16. Healthcare personnel are aware of the correct procedures for replacing fluid bags and adjusting IV stands. | On-site inspection or inquiry |
| **Post-shutdown management** | 26. When the coagulation-related pressure reaches 90% of the alarm threshold (transmembrane pressure 250–300 mmHg or pre-filter pressure 150–180 mmHg), promptly disconnect the machine to prevent blood wastage. | 17. Healthcare personnel are aware of the criteria for discontinuing CRRT. | On-site inspection or inquiry |
|  | 27. Employ pulse flushing and positive pressure sealing techniques for catheter maintenance. | 18. Healthcare providers are aware of the use of pulsatile flushing and positive pressure occlusion techniques for catheter maintenance. | On-site inspection or inquiry |
|  | 28. For patients without bleeding risk: Use heparin solution at 1000–1250 U/mL for tube sealing every 12–24 hours. | 19. Healthcare providers are aware of catheter maintenance following discontinuation of corresponding CRRT. | On-site inspection or inquiry |
|  | 29. For patients with bleeding risk or heparin contraindications: Use <5% citrate solution for tube sealing every 12–24 hours. |  |  |

Table 2 Factors Hindering and Facilitating Unplanned Discontinuation of CRRT in Critically Ill Patients and Corresponding Measures

| Project | Barrier | promotion | Measures |
| --- | --- | --- | --- |
| Organizational aspects | 1.Lack of effective team organization and support | 1.Establish a quality control team related to the department's establishment. | 1.The department established a multidisciplinary prevention team and developed an intervention plan with clearly defined roles. Nurses and provincial-level hemodialysis nurses each performed their respective duties while maintaining constant communication and collaboration. |
|  | 2. Lack of corresponding verification checklists and operational procedures | 2.Managerial attention and support | 2.Based on the relevant discussions within the group, develop a procedure and checklist for preventing unplanned discontinuation of CRRT. |
|  | 3.The department's current training content is not comprehensive. | 3.Team members reorganized the training content to balance practical application with theoretical foundations. | 3.Interpretation of relevant guidelines and operational standards. Training content is divided into theoretical training and skills training. Theoretical training consists of three sessions covering CRRT-related topics, DRPI prevention measures, and risk scale application. Hemodialysis nurses and critical care specialty nurses will serve as trainers. Skills training focuses on two competencies: bedside CRRT operation, delivered by hemodialysis nurses. Notably, psychological care components have been integrated into the skills training to enhance healthcare providers' holistic care capabilities. |
| Practitioners aspects | 4.Healthcare personnel are unclear about the corresponding reasons for unplanned disengagement and the handling procedures. | 4.Medical staff have shown a positive attitude toward improvement and are diligent in their studies. | 4.Establish relevant quality control teams and conduct quarterly quality control analysis of the data. |
|  | 5.Healthcare personnel lack sufficient awareness of the importance of corresponding unplanned disconnection causes and handling procedures. |  | 5.Standardized Operations: Regular training and assessments, with assessment results linked to year-end rankings. |
|  | 3.Healthcare providers provide insufficient psychological care for patients undergoing continuous renal replacement therapy (CRRT). | 5.Improve work models to enable healthcare providers to focus more on the holistic nature of the individual. | 6.CSICU previously operated under a responsibility group system, where one nurse cared for 2 to 3 patients. This has been modified such that when caring for critically ill patients undergoing CRRT treatment, a single nurse is assigned to that patient. (If one nurse is assigned to two patients, the second patient must be assessed as being in a stable condition.) |
| Patients aspects | High-risk patients requiring CRRT receive inadequate preoperative education. | 6.Patients are highly motivated, with some demonstrating a strong level of understanding. | 7.For high-risk patients, healthcare providers should conduct comprehensive assessments and, when necessary, initiate multidisciplinary collaborative prevention teams prior to surgery. |
|  | Patients demonstrated poor compliance and insufficient understanding during postoperative CRRT treatment. |  | 8.Postoperative complications (especially those related to CRRT procedures) are addressed through various forms of health education demonstrations and explanations. |
